# Supplementary material for: Establishment of ABEI-based direct chemiluminescence immunoassays for PIC, TAT, tPAIC, and TM and their preliminary evaluation in thrombotic diseases
Source: Royal Society of Chemistry journal article supplement (doi:10.1039/d5ay00537j), 2025-01-01
Supplement: d5ay00537j1.pdf [file d5ay00537j1.pdf]

**Supplementary Information**

**Establishment of ABEI-based direct chemiluminescence immunoassays for PIC, TAT, tPAIC, TM and  
the preliminary evaluation in thrombotic diseases**

Honggao Sun,<sup>‡a</sup> Kun Liu,<sup>‡b</sup> Jinqiu Fu,<sup>‡b</sup> Xuehong Li,<sup>a</sup> Lili Qiu,<sup>a</sup> Manna Weng,<sup>a</sup> Yun Zhang,<sup>b</sup> Jiayi Zhang,<sup>b</sup>  
Ke Huang,<sup>b</sup> Xing Gan,<sup>b</sup> Zhonggang Fang,<sup>\*b</sup> and Hua Pei,<sup>\*a</sup>

<sup>a</sup>Clinical Laboratory, the Second Affiliated Hospital of Hainan Medical University, Haikou, P.R. China.

<sup>b</sup>Research & Development Department, Shenzhen New Industries Biomedical Engineering Co., Ltd.  
(Snibe), Shenzhen, P.R. China.

\* Corresponding author:

Hua Pei, Email: 358672755@qq.com,

Zhonggang Fang, Email: [zhonggang\\_fang@snibe.cn](mailto:zhonggang_fang@snibe.cn)

<sup>‡</sup> HGS, KL and JQF contributed equally to this work

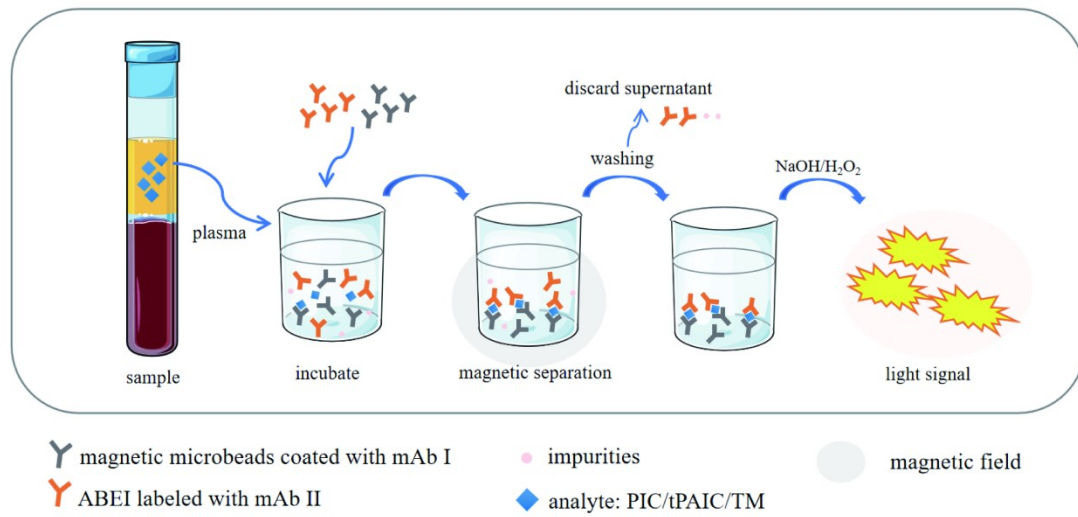

**Supplementary Fig. S1** Schematic diagram of the “one step” quantitative detection of MAGLUMI PIC, tPAIC or TM CLIA test. Abbreviation: mAb, monoclonal antibody.

**Supplementary Table S1.** The LOB, LOD and LOQ of MAGLUMI PIC, TAT, tPAIC and TM CLIA reagents.

|               | Lot | LOB          | LOD          | LOQ          |
|---------------|-----|--------------|--------------|--------------|
| PIC (µg/mL)   | 1   | <b>0.029</b> | <b>0.038</b> | 0.044        |
|               | 2   | 0.028        | 0.037        | 0.044        |
|               | 3   | <b>0.029</b> | <b>0.038</b> | <b>0.046</b> |
| TAT (ng/mL)   | 1   | 0.140        | <b>0.279</b> | <b>0.356</b> |
|               | 2   | <b>0.146</b> | 0.272        | 0.350        |
|               | 3   | 0.145        | 0.276        | 0.345        |
| tPAIC (ng/mL) | 1   | 0.388        | 0.638        | 0.907        |
|               | 2   | <b>0.393</b> | 0.620        | <b>0.934</b> |
|               | 3   | 0.370        | <b>0.654</b> | 0.801        |
| TM (TU/mL)    | 1   | 0.386        | <b>0.643</b> | 0.807        |
|               | 2   | 0.381        | 0.616        | <b>0.895</b> |
|               | 3   | <b>0.395</b> | 0.628        | 0.877        |

**Supplementary Table S2.** Precision of MAGLUMI PIC, TAT, tPAIC and TM CLIA reagents.

Abbreviation: CV, coefficient of variation; C1, control 1; C2, control 2.

| Analyte          | Sample | Mean<br>(n=180) | Within-Run<br>(%CV) | Between-Run<br>(%CV) | Between-Day<br>(%CV) | Between-Lot<br>(%CV) | Within-Lab<br>(%CV) | Reproducibility<br>(%CV) |
|------------------|--------|-----------------|---------------------|----------------------|----------------------|----------------------|---------------------|--------------------------|
| PIC<br>(µg/mL)   | 1      | 0.824           | 3.03%               | 1.09%                | 1.82%                | 0.85%                | 3.76%               | 3.76%                    |
|                  | 2      | 5.149           | 2.37%               | 1.63%                | 1.03%                | 0.45%                | 3.09%               | 3.28%                    |
|                  | 3      | 21.051          | 1.93%               | 1.32%                | 1.11%                | 0.95%                | 2.75%               | 2.84%                    |
|                  | C1     | 0.997           | 3.11%               | 1.30%                | 1.81%                | 0.90%                | 3.91%               | 4.11%                    |
|                  | C2     | 9.873           | 2.83%               | 1.56%                | 1.16%                | 1.02%                | 3.59%               | 4.31%                    |
| TAT<br>(ng/mL)   | 1      | 3.808           | 2.76%               | 1.73%                | 1.13%                | 0.42%                | 3.47%               | 3.57%                    |
|                  | 2      | 20.667          | 2.31%               | 0.87%                | 1.76%                | 1.23%                | 3.27%               | 3.55%                    |
|                  | 3      | 101.937         | 1.97%               | 1.35%                | 0.92%                | 0.72%                | 2.66%               | 2.95%                    |
|                  | C1     | 5.001           | 3.20%               | 1.86%                | 1.82%                | 1.18%                | 4.28%               | 4.42%                    |
|                  | C2     | 51.127          | 2.55%               | 1.08%                | 1.48%                | 1.38%                | 3.43%               | 4.21%                    |
| tPAIC<br>(ng/mL) | 1      | 10.276          | 2.66%               | 1.49%                | 1.68%                | 1.45%                | 3.77%               | 3.86%                    |
|                  | 2      | 39.638          | 2.56%               | 0.93%                | 1.08%                | 0.96%                | 3.08%               | 3.16%                    |
|                  | 3      | 79.837          | 1.94%               | 1.59%                | 0.45%                | 0.67%                | 2.64%               | 3.30%                    |
|                  | C1     | 5.013           | 2.91%               | 1.04%                | 1.92%                | 1.06%                | 3.79%               | 5.29%                    |
|                  | C2     | 19.915          | 2.77%               | 1.05%                | 1.21%                | 0.55%                | 3.24%               | 3.29%                    |
| TM<br>(TU/mL)    | 1      | 5.153           | 3.18%               | 0.72%                | 1.71%                | 0.80%                | 3.76%               | 3.94%                    |
|                  | 2      | 15.648          | 2.08%               | 1.87%                | 0.20%                | 0.70%                | 2.89%               | 3.09%                    |
|                  | 3      | 102.659         | 2.07%               | 1.15%                | 0.59%                | 0.67%                | 2.53%               | 2.90%                    |
|                  | C1     | 9.966           | 2.70%               | 2.51%                | 0.76%                | 1.31%                | 3.98%               | 4.04%                    |
|                  | C2     | 49.921          | 2.43%               | 0.26%                | 1.66%                | 0.52%                | 3.00%               | 3.08%                    |

**Supplementary Table S3.** Analytical recovery tests of MAGLUMI PIC, TAT, tPAIC and TM CLIA reagents.

| Analyte       | added<br>concentration | Measured value |         |         | Recovery rate (%) |        |        |
|---------------|------------------------|----------------|---------|---------|-------------------|--------|--------|
|               |                        | Lot1           | Lot2    | Lot3    | Lot1              | Lot2   | Lot3   |
| PIC (µg/mL)   | 0                      | 0.504          | 0.509   | 0.518   | /                 | /      | /      |
|               | 0.8                    | 1.297          | 1.311   | 1.317   | 99.13             | 100.25 | 99.88  |
|               | 3                      | 3.560          | 3.514   | 3.589   | 101.87            | 100.17 | 102.37 |
|               | 30                     | 30.509         | 30.716  | 30.337  | 100.02            | 100.69 | 99.40  |
| TAT (ng/mL)   | 0                      | 0.496          | 0.493   | 0.497   | /                 | /      | /      |
|               | 4                      | 4.552          | 4.443   | 4.513   | 101.40            | 98.75  | 100.40 |
|               | 10                     | 10.128         | 10.264  | 10.614  | 96.32             | 97.71  | 101.17 |
|               | 90                     | 91.973         | 88.711  | 89.767  | 101.64            | 98.02  | 99.19  |
| tPAIC (ng/mL) | 0                      | 4.717          | 4.462   | 4.482   | /                 | /      | /      |
|               | 3                      | 7.508          | 7.414   | 7.411   | 93.03             | 98.40  | 97.63  |
|               | 9                      | 13.332         | 13.613  | 13.620  | 95.72             | 101.68 | 101.53 |
|               | 75                     | 79.826         | 80.523  | 80.685  | 100.15            | 101.41 | 101.60 |
| TM (TU/mL)    | 0                      | 4.015          | 4.201   | 4.134   | /                 | /      | /      |
|               | 4                      | 7.955          | 8.103   | 8.033   | 98.50             | 97.55  | 97.48  |
|               | 13                     | 16.758         | 16.751  | 16.980  | 98.02             | 96.54  | 98.82  |
|               | 150                    | 153.168        | 151.802 | 153.364 | 99.44             | 98.40  | 99.49  |

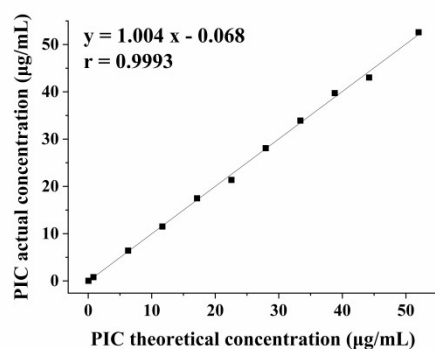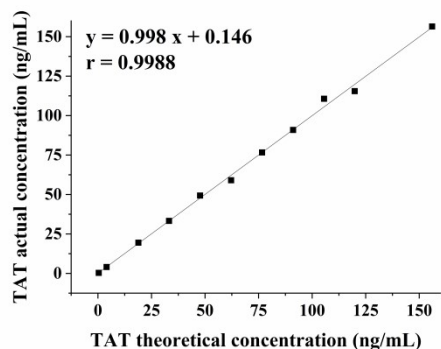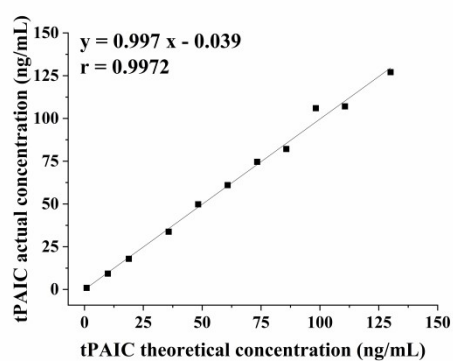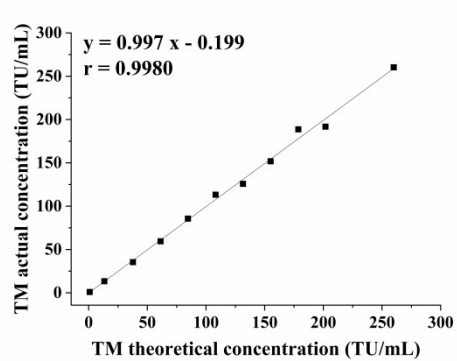

**Supplementary Fig. S2** Representative graphs of linearity using one lot for the detection of PIC (0.45-52.00 µg/mL), TAT (0.36-156.00 ng/mL), tPAIC (0.90-130.00 ng/mL) and TM (0.90-260.00 TU/mL).

**Supplementary Table S4.** Interference from supplement of hemoglobin, triglyceride and bilirubin.

| analytes | Levels | Lot  | bilirubin |          | hemoglobin |           | lipid emulsion |            |
|----------|--------|------|-----------|----------|------------|-----------|----------------|------------|
|          |        |      | 10 mg/dL  | 20 mg/dL | 250 mg/dL  | 500 mg/dL | 500 mg/dL      | 1000 mg/dL |
| PIC      | Low    | Lot1 | -3.98%    | 0.53%    | -1.46%     | -1.99%    | 0.13%          | 1.35%      |
|          |        | Lot2 | 1.20%     | 0.40%    | 0.27%      | 0.40%     | 1.20%          | 0.40%      |
|          |        | Lot3 | 1.35%     | 1.48%    | 1.07%      | -0.13%    | 4.64%          | 4.10%      |
|          | Medium | Lot1 | -1.78%    | -0.89%   | -0.59%     | 1.83%     | -2.70%         | -0.16%     |
|          |        | Lot2 | 0.81%     | 0.67%    | -1.45%     | 0.68%     | 3.85%          | 1.06%      |
|          |        | Lot3 | -0.57%    | -3.54%   | 3.02%      | -0.53%    | 1.41%          | 0.98%      |
|          | High   | Lot1 | 0.58%     | -0.50%   | 4.04%      | 2.27%     | -4.09%         | -2.51%     |
|          |        | Lot2 | -1.71%    | 0.04%    | 0.82%      | -1.52%    | -2.58%         | -1.08%     |
|          |        | Lot3 | 0.44%     | 2.16%    | 0.53%      | 0.30%     | -0.29%         | 3.06%      |
| TAT      | Low    | Lot1 | 0.61%     | -2.69%   | 1.01%      | 0.57%     | -4.85%         | -3.32%     |
|          |        | Lot2 | 2.92%     | 3.06%    | -4.50%     | -1.16%    | -2.31%         | -0.18%     |
|          |        | Lot3 | -0.37%    | -0.60%   | 0.68%      | -0.03%    | -2.76%         | -1.84%     |
|          | Medium | Lot1 | -4.28%    | -0.04%   | 3.04%      | 2.06%     | -2.67%         | -0.69%     |
|          |        | Lot2 | -1.98%    | -0.57%   | -2.72%     | 2.52%     | -0.35%         | 0.54%      |
|          |        | Lot3 | 2.38%     | 2.40%    | 1.22%      | 3.18%     | 0.46%          | 1.59%      |
|          | High   | Lot1 | 0.51%     | 0.14%    | 1.77%      | -0.74%    | -0.23%         | -0.43%     |
|          |        | Lot2 | -3.32%    | -1.32%   | -2.64%     | -0.78%    | 3.13%          | 2.52%      |
|          |        | Lot3 | -1.19%    | 1.33%    | -4.89%     | -3.30%    | -0.96%         | -2.97%     |
| tPAIC    | Low    | Lot1 | 2.40%     | 0.01%    | -2.04%     | -2.16%    | 0.76%          | 0.79%      |
|          |        | Lot2 | 1.87%     | 1.42%    | -3.37%     | -3.91%    | -2.03%         | -2.90%     |
|          |        | Lot3 | 3.51%     | 2.97%    | 3.88%      | 2.85%     | 0.91%          | 2.57%      |
|          | Medium | Lot1 | -2.05%    | 0.58%    | -1.56%     | 0.99%     | 1.17%          | -0.15%     |
|          |        | Lot2 | 3.42%     | 3.39%    | 0.60%      | -0.26%    | 1.61%          | 3.75%      |
|          |        | Lot3 | -0.75%    | 0.53%    | -4.57%     | 0.75%     | 1.25%          | -0.13%     |
|          | High   | Lot1 | 2.39%     | 0.52%    | -0.09%     | -2.52%    | -3.06%         | -0.79%     |
|          |        | Lot2 | -2.60%    | -2.83%   | -2.23%     | 1.48%     | 2.05%          | 1.47%      |
|          |        | Lot3 | -2.32%    | 0.66%    | 2.15%      | 2.85%     | -1.95%         | -0.37%     |
| TM       | Low    | Lot1 | -2.19%    | -1.13%   | -1.93%     | -1.59%    | -1.30%         | -0.09%     |
|          |        | Lot2 | -3.22%    | -2.09%   | -0.51%     | 1.18%     | 2.20%          | 2.41%      |
|          |        | Lot3 | -1.55%    | -0.33%   | 1.19%      | 4.41%     | 1.13%          | 0.32%      |
|          | Medium | Lot1 | -1.47%    | 0.68%    | -2.23%     | -2.34%    | 3.15%          | 2.69%      |
|          |        | Lot2 | 1.27%     | 4.02%    | -0.39%     | -0.68%    | -0.03%         | -2.78%     |
|          |        | Lot3 | -1.53%    | 0.45%    | 0.76%      | 0.80%     | 2.73%          | 0.83%      |
|          | High   | Lot1 | 2.19%     | 1.85%    | -5.47%     | -4.49%    | -2.91%         | -3.61%     |
|          |        | Lot2 | 1.92%     | -2.31%   | -2.54%     | -1.23%    | 1.77%          | 1.44%      |
|          |        | Lot3 | -2.63%    | -1.83%   | -2.75%     | 0.25%     | -2.21%         | -1.03%     |

| Variable         | AUC (95%CI)         | Sensitivity (%) | Specificity (%) | Youden Index |
|------------------|---------------------|-----------------|-----------------|--------------|
| PIC              | 0.788 (0.702-0.858) | 64.0            | 81.8            | 0.458        |
| TAT              | 0.798 (0.713-0.867) | 82.0            | 66.7            | 0.487        |
| tPAIC            | 0.835 (0.755-0.898) | 70.0            | 95.5            | 0.655        |
| TM               | 0.844 (0.765-0.905) | 80.0            | 81.8            | 0.618        |
| PIC+tPAIC        | 0.915 (0.849-0.959) | 84.0            | 92.4            | 0.764        |
| PIC+TAT+tPAIC+TM | 0.913 (0.846-0.957) | 86.0            | 90.9            | 0.769        |

**Supplementary Table S5.** ROC analysis of thrombosis markers for DIC diagnosis.

| Variable         | AUC (95%CI)         | Sensitivity (%) | Specificity (%) | Youden Index |
|------------------|---------------------|-----------------|-----------------|--------------|
| PIC              | 0.713 (0.624-0.791) | 60.0            | 74.1            | 0.341        |
| TAT              | 0.806 (0.725-0.872) | 73.9            | 79.3            | 0.532        |
| tPAIC            | 0.673 (0.582-0.754) | 80.0            | 55.2            | 0.352        |
| TM               | 0.561 (0.469-0.651) | 73.9            | 46.6            | 0.204        |
| PIC+TAT+tPAIC    | 0.839 (0.762-0.899) | 73.9            | 81.0            | 0.549        |
| PIC+TAT+tPAIC+TM | 0.841 (0.764-0.900) | 73.9            | 79.3            | 0.532        |

**Supplementary Table S6.** ROC analysis of thrombosis markers for IS diagnosis.
